# Supplementary material
Source: PubMed Central journal article supplement (PMC8142633)

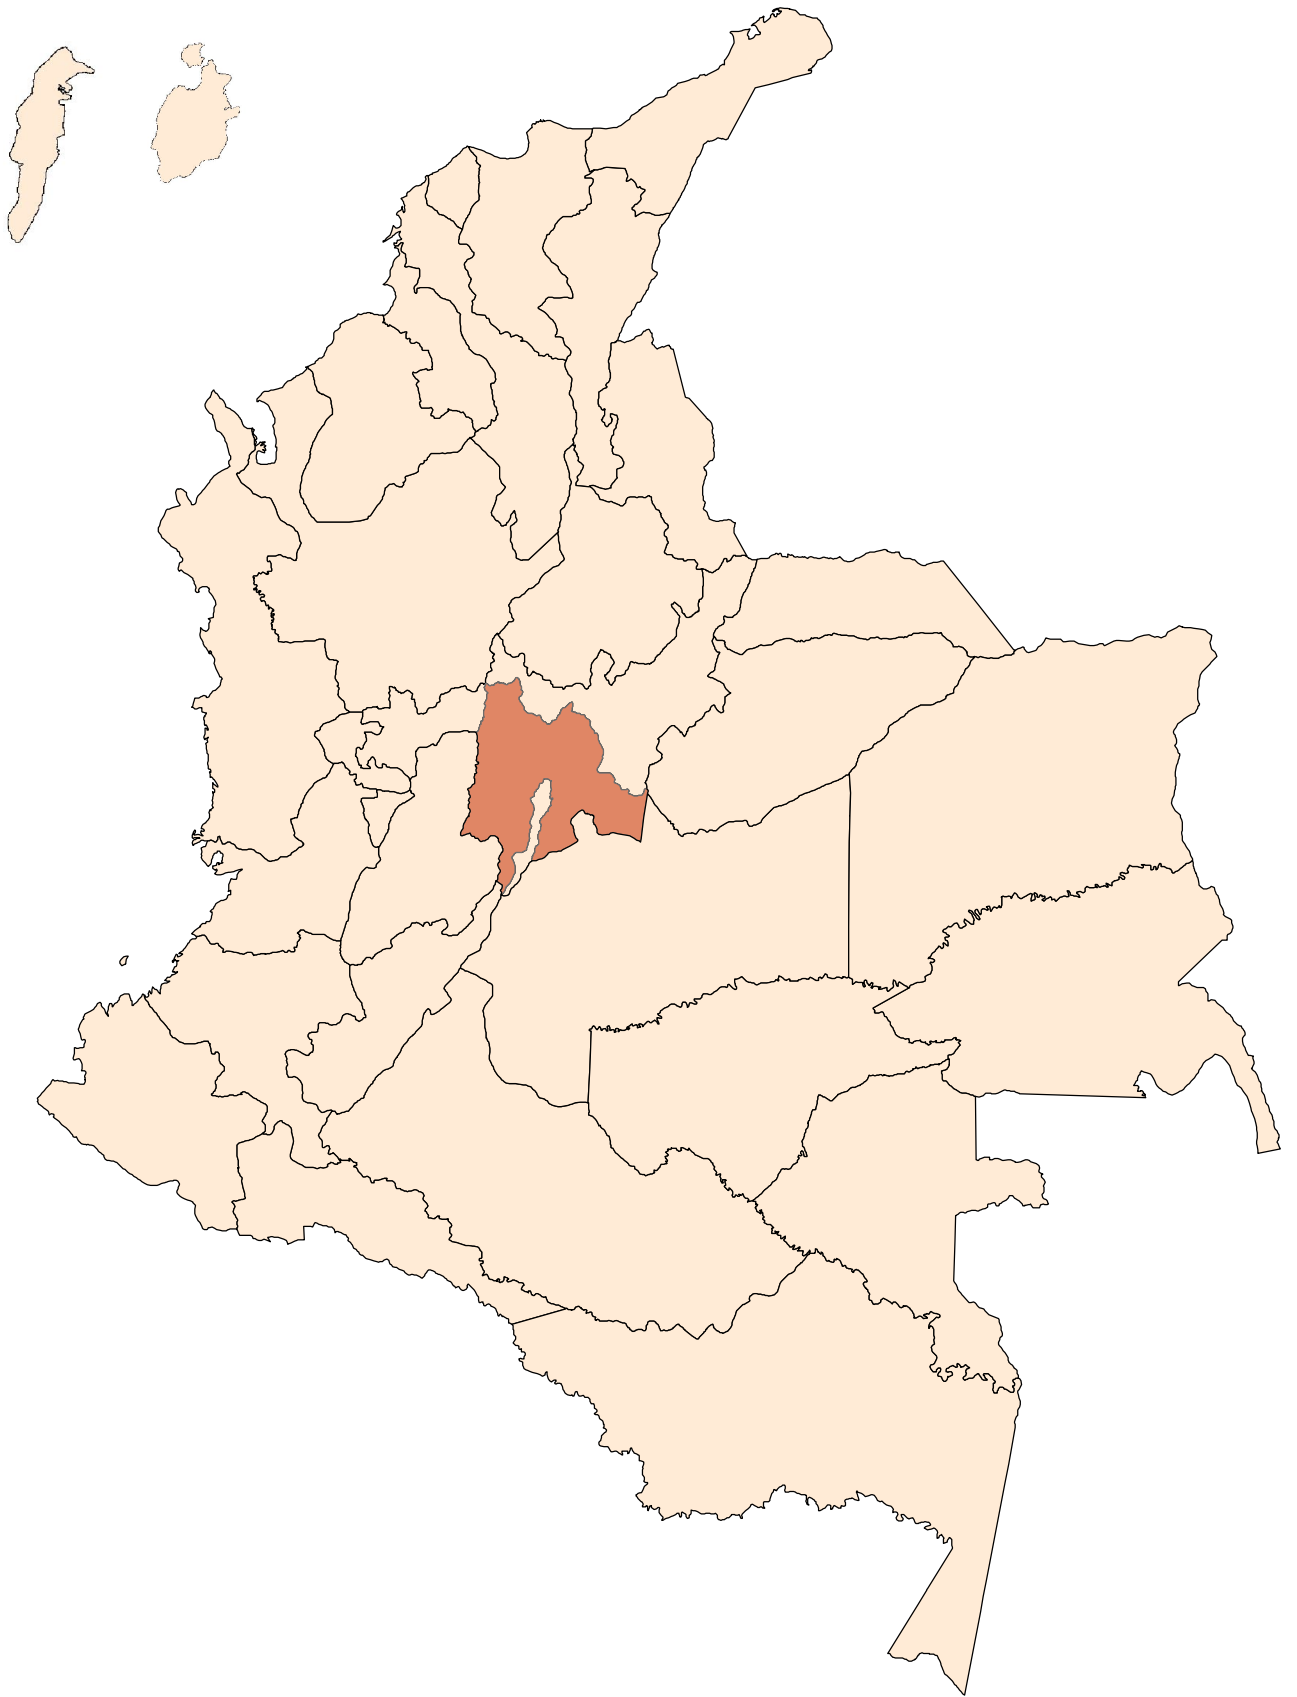

 Cundinamarca

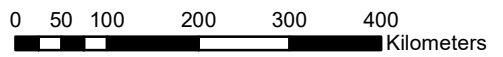

Supplement: 12941_2021_445_MOESM1_ESM.pdf [file 12941_2021_445_MOESM1_ESM.pdf]
